# Supplementary material for: Only α‐Gal bound to lipids, but not to proteins, is transported across enterocytes as an IgE‐reactive molecule that can induce effector cell activation
Source: PubMed Central journal article supplement (PMC6852507; doi:10.1111/all.13873), 2019-07-16

## SUPPLEMENTARY FIGURES

Figure S1

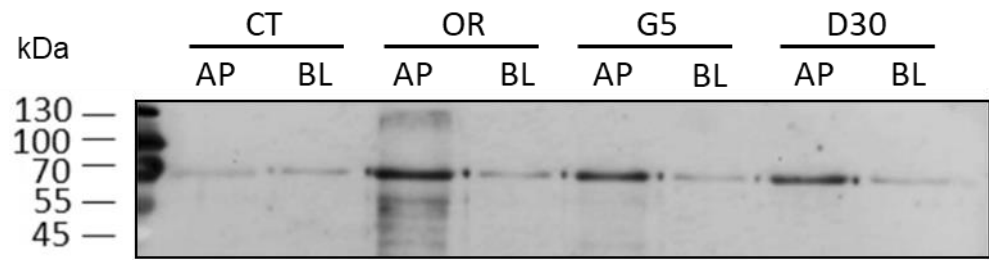

Figure S2

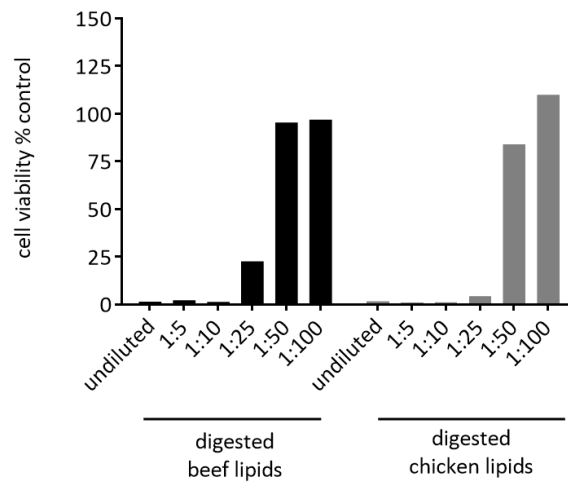

Figure S3

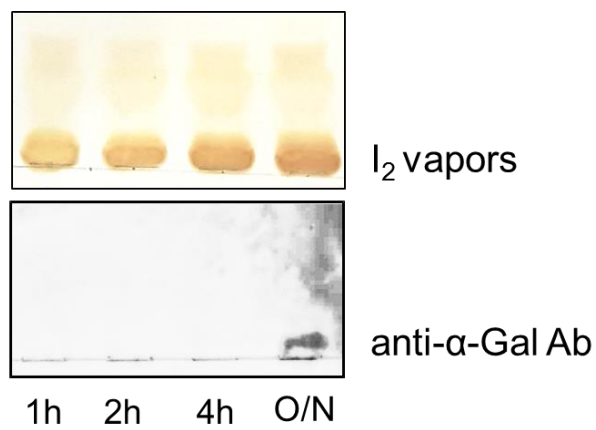

Supplement: ALL-74-1956-s001.pdf [file ALL-74-1956-s001.pdf]
